# Supplementary material
Source: Research Square preprint supplement (doi:10.21203/rs.3.rs-9665628/v1)
Supplement: Supplementary file 1 [file b21c3976949a1bd44b12a2cb.docx]

**1. STROBE CHECKLIST**

**TITLE AND ABSTRACT**

- ✔ The study design is indicated in the title (retrospective cohort study)
- ✔ The abstract provides an informative summary of methods and results

**INTRODUCTION**

**Background/rationale**

- ✔ Scientific background is clearly presented
- ✔ Clinical relevance of severe hypospadias is explained

**Objectives**

- ✔ Clear objective stated: identification of predictors of postoperative complications

**METHODS**

**Study design**

- ✔ Retrospective cohort study clearly defined

**Setting**

- ✔ Single tertiary referral center described (Grenoble-Alpes University Hospital)

**Participants**

- ✔ Inclusion criteria defined (severe hypospadias cases)
- ✔ Exclusion criteria stated (incomplete records / follow-up)

**Variables**

- ✔ Outcomes clearly defined (postoperative complications)
- ✔ Predictors defined (clinical and surgical variables)

**Data sources/measurement**

- ✔ Medical records used
- ✔ Standardized data extraction form applied

**Bias**

- ✔ Retrospective design acknowledged as limitation

**Study size**

- ✔ Final sample: 45 patients

**Statistical methods**

- ✔ Univariate analysis performed
- ✔ Multivariate logistic regression used
- ✔ Adjusted odds ratios reported
- ✔ p < 0.05 considered significant

**RESULTS**

**Participants**

- ✔ Flow of participants described
- ✔ Final sample clearly reported

**Descriptive data**

- ✔ Baseline characteristics provided

**Outcome data**

- ✔ Complication rate clearly reported

**Main results**

- ✔ Associated anomalies identified as independent risk factor

**DISCUSSION**

**Key results**

- ✔ Main findings summarized

**Limitations**

- ✔ Retrospective design acknowledged
- ✔ Small sample size discussed
- ✔ Single-center limitation stated

**Interpretation**

- ✔ Findings compared with literature

**Generalizability**

- ✔ Limited external validity discussed

**OTHER INFORMATION**

**Ethics**

- ✔ Ethics approval obtained
- ✔ Patient confidentiality ensured

**Funding**

- ✔ No external funding declared

**Conflicts of interest**

- ✔ None declared
