# Supplementary material
Source: Research Square preprint supplement (doi:10.21203/rs.3.rs-9665628/v1)
Supplement: Supplementary file 2 [file f36e043ed4e0735ffa4c3fd3.pdf]

**TABLE 1. Baseline demographic and clinical characteristics of the study population**

| <b>Variables</b>                   | <b>n (%)</b> |
|------------------------------------|--------------|
| Total patients                     | 45           |
| Mean age at first surgery (months) | 17.2 ± 6.3   |
| Diagnosis at birth                 | 41 (91.1)    |
| Posterior hypospadias              | 25 (55.5)    |
| Middle hypospadias                 | 11 (24.5)    |
| Complex anterior forms             | 9 (20.0)     |
| Penile curvature present           | 40 (88.9)    |
| Associated anomalies               | 15 (33.3)    |
| Preoperative hormonal stimulation  | 10 (22.2)    |

**TABLE 2. Associated congenital anomalies**

| <b>Associated anomalies n (%)</b> |          |
|-----------------------------------|----------|
| Cryptorchidism                    | 7 (15.5) |
| Inguinoscrotal hernia             | 4 (8.9)  |
| Hydrocele                         | 2 (4.4)  |
| Bifid scrotum                     | 2 (4.4)  |
| Micropenis                        | 2 (4.4)  |
| Sexual ambiguity                  | 1 (2.2)  |

**TABLE 3. Surgical techniques used**

| <b>Surgical techniques</b> | <b>n (%)</b> |
|----------------------------|--------------|
| Duplay procedure           | 18 (40.0)    |
| Combined Duplay procedures | 22 (48.8)    |
| Mathieu technique          | 6 (13.3)     |
| Koff technique             | 4 (8.9)      |
| Koyanagi technique         | 3 (6.7)      |
| Buccal mucosa graft        | 3 (6.7)      |
| Onlay/Duckett repair       | 2 (4.4)      |

**TABLE 4. Postoperative complications**

| <b>Complications</b>     | <b>n (%)</b> |
|--------------------------|--------------|
| Any complication         | 19 (42.2)    |
| Urethrocutaneous fistula | 14 (31.1)    |
| Meatal/urethral stenosis | 5 (11.1)     |
| Wound dehiscence         | 2 (4.4)      |
| Tissue necrosis          | 1 (2.2)      |

**TABLE 5. Multivariate analysis of factors associated with postoperative complications**

| <b>Variables</b>      | <b>aOR</b> | <b>95% CI</b> | <b>p-value</b> |
|-----------------------|------------|---------------|----------------|
| Associated anomalies  | 2.4        | 1.9–3.1       | 0.010          |
| Posterior hypospadias | 1.8        | 1.1–2.7       | 0.034          |
| Age at surgery        | 1.1        | 0.8–1.5       | 0.412          |
